# Supplementary material for: Sustainability Consciousness and Awareness of Sustainable Development Goals among Future Engineers
Source: Preprints.org preprint supplement (doi:10.20944/preprints202409.1920.v1), 2024-09-24
Supplement: Supplementary file 1 [file supplementary]

**Table S1**: SCQ Questionnaire (Gericke et al., 2019)

| **Knowingness** |  |
| --- | --- |
| *Environmental* | Reducing water consumption is necessary for SD. |
| Preserving the variety of living creatures is necessary for SD. |
| For SD, people need to be educated in how to protect themselves against natural disasters. |
| *Social* | A culture where conflicts are resolved peacefully through discussion is necessary for SD. |
| Respecting human rights is necessary for SD. |
| To achieve SD, all the people in the world must have access to good education. |
| *Economic* | SD requires that companies act responsibly towards their employees, customers and suppliers. |
| SD requires a fair distribution of goods and services among people in the world. |
| Wiping out poverty in the world is necessary for SD. |
| **Attitude** |  |
| *Environmental* | I think that over-exploiting natural resources does not threaten the health and well-being future generations. |
| I think that we need stricter laws and regulations to protect the environment. |
| I think that it is important to take measures against problems related to climate change. |
| *Social* | I think that everyone should be able to acquire the knowledge, values and skills necessary to live sustainably. |
| I think that we should ensure future generations enjoy the same quality of life as we do today. |
| I think that women and men must be given the same opportunities for education and employment. |
| *Economic* | I think that companies have a responsibility to reduce the use of packaging and disposable articles. |
| I think it is important to reduce poverty. |
| I think that companies in rich countries should give employees in poor nations the same conditions as in rich countries. |
| **Behavior** |  |
| *Environmental* | I recycle as much as I can. |
| I always separate food waste before putting out the rubbish when I have the chance. |
| I have changed my personal lifestyle in order to reduce waste (e.g., throwing away less food). |
| *Social* | On online platforms, I always treat others as respectfully as I would in real life. |
| I support an aid organization or environmental group. |
| I show the same respect to men and women, boys and girls. |
| *Economic* | I do things which help poor people. |
| I often purchase second-hand goods over the internet or in a shop. |
| I avoid buying goods from companies with a bad reputation for looking after their employees and the environment. |

**Table S2**: Coding for KAB Statements

| **Code** | **Statement** |
| --- | --- |
| K1 | Reducing water consumption is necessary for SD. |
| K2 | Preserving the variety of living creatures is necessary for SD. |
| K3 | For SD, people need to be educated in how to protect themselves against natural disasters. |
| K4 | A culture where conflicts are resolved peacefully through discussion is necessary for SD. |
| K5 | Respecting human rights is necessary for SD. |
| K6 | To achieve SD, all the people in the world must have access to good education. |
| K7 | SD requires that companies act responsibly towards their employees, customers and suppliers. |
| K8 | SD requires a fair distribution of goods and services among people in the world. |
| K9 | Wiping out poverty in the world is necessary for SD. |
| A1 | I think that over-exploiting natural resources does not threaten the health and well-being future generations. |
| A2 | I think that we need stricter laws and regulations to protect the environment. |
| A3 | I think that it is important to take measures against problems related to climate change. |
| A4 | I think that everyone should be able to acquire the knowledge, values and skills necessary to live sustainably. |
| A5 | I think that we should ensure future generations enjoy the same quality of life as we do today. |
| A6 | I think that women and men must be given the same opportunities for education and employment. |
| A7 | I think that companies have a responsibility to reduce the use of packaging and disposable articles. |
| A8 | I think it is important to reduce poverty. |
| A9 | I think that companies in rich countries should give employees same conditions in any country. |
| B1 | I recycle as much as I can. |
| B2 | I always separate food waste before putting out the rubbish when I have the chance. |
| B3 | I have changed my personal lifestyle in order to reduce waste (e.g., throwing away less food). |
| B4 | On online platforms, I always treat others as respectfully as I would in real life. |
| B5 | I support an aid organization or environmental group. |
| B6 | I show the same respect to men and women, boys and girls. |
| B7 | I do things which help poor people. |
| B8 | I often purchase second-hand goods over the internet or in a shop. |
| B9 | I avoid buying goods from companies with a bad reputation for looking after their employees and the environment. |

**Table S3**: Percentage of Students’ Knowledge on SDGs

| **Code** | **Statement** | **SD*** | **D*** | **N*** | **A*** | **SA*** |
| --- | --- | --- | --- | --- | --- | --- |
| K1 | Reducing water consumption is necessary for SD. | 2.24 | 6.72 | 26.87 | 52.24 | 11.94 |
| K2 | Preserving the variety of living creatures is necessary for SD. | 0.75 | 5.22 | 32.84 | 44.78 | 16.42 |
| K3 | For SD, people need to be educated in how to protect themselves against natural disasters. | 0.75 | 5.22 | 19.4 | 54.48 | 20.15 |
| K4 | A culture where conflicts are resolved peacefully through discussion is necessary for SD. | 2.24 | 5.97 | 35.07 | 41.79 | 14.93 |
| K5 | Respecting human rights is necessary for SD. | 0.75 | 5.22 | 23.88 | 53.73 | 16.42 |
| K6 | To achieve SD, all the people in the world must have access to good education. | 0.75 | 2.24 | 27.61 | 41.79 | 27.61 |
| K7 | SD requires that companies act responsibly towards their employees, customers and suppliers. | 0 | 8.96 | 20.9 | 53.73 | 16.42 |
| K8 | SD requires a fair distribution of goods and services among people in the world. | 0.75 | 4.48 | 26.87 | 55.22 | 12.69 |
| K9 | Wiping out poverty in the world is necessary for SD. | 0 | 9.7 | 34.33 | 43.28 | 12.69 |

SD*: Strongly Disagree; D*: Disagree; N*: Neutral; A*: Agree; SA*: Strongly Agree

**Table S4**: Percentage of Students’ Attitude on SDGs

| **Code** | **Statement** | **SD*** | **D*** | **N*** | **A*** | **SA*** |
| --- | --- | --- | --- | --- | --- | --- |
| A1 | I think that over-exploiting natural resources does not threaten the health and well-being future generations. | 5.22 | 14.18 | 27.61 | 43.28 | 9.7 |
| A2 | I think that we need stricter laws and regulations to protect the environment. | 2.99 | 3.73 | 28.36 | 49.25 | 15.67 |
| A3 | I think that it is important to take measures against problems related to climate change. | 0 | 5.97 | 23.88 | 55.22 | 14.93 |
| A4 | I think that everyone should be able to acquire the knowledge, values and skills necessary to live sustainably. | 0.75 | 2.99 | 26.87 | 48.51 | 20.9 |
| A5 | I think that we should ensure future generations enjoy the same quality of life as we do today. | 2.24 | 4.48 | 20.9 | 50 | 22.39 |
| A6 | I think that women and men must be given the same opportunities for education and employment. | 2.24 | 1.49 | 30.6 | 47.01 | 18.66 |
| A7 | I think that companies have a responsibility to reduce the use of packaging and disposable articles. | 1.49 | 4.48 | 32.09 | 45.52 | 16.42 |
| A8 | I think it is important to reduce poverty. | 1.49 | 2.24 | 27.61 | 50 | 18.66 |
| A9 | I think that companies in rich countries should give employees in poor nations the same conditions as in rich countries. | 0.75 | 4.48 | 35.07 | 44.78 | 14.93 |

SD*: Strongly Disagree; D*: Disagree; N*: Neutral; A*: Agree; SA*: Strongly Agree

**Table S5**: Percentage of Students’ Behavior on SDGs

| **Code** | **Statement** | **SD*** | **D*** | **N*** | **A*** | **SA*** |
| --- | --- | --- | --- | --- | --- | --- |
| B1 | I recycle as much as I can. | 2.99 | 1.49 | 23.13 | 49.25 | 23.13 |
| B2 | I always separate food waste before putting out the rubbish when I have the chance. | 1.49 | 3.73 | 27.61 | 47.01 | 20.15 |
| B3 | I have changed my personal lifestyle in order to reduce waste (e.g., throwing away less food). | 1.49 | 1.49 | 27.61 | 52.24 | 17.16 |
| B4 | On online platforms, I always treat others as respectfully as I would in real life. | 2.99 | 2.99 | 26.12 | 49.25 | 18.66 |
| B5 | I support an aid organization or environmental group. | 2.24 | 2.24 | 31.34 | 50 | 14.18 |
| B6 | I show the same respect to men and women, boys and girls. | 1.49 | 1.49 | 27.61 | 47.76 | 21.64 |
| B7 | I do things which help poor people. | 1.49 | 2.99 | 24.63 | 49.25 | 21.64 |
| B8 | I often purchase second-hand goods over the internet or in a shop. | 2.99 | 8.96 | 34.33 | 43.28 | 10.45 |
| B9 | I avoid buying goods from companies with a bad reputation for looking after their employees and the environment. | 1.49 | 2.99 | 38.06 | 44.03 | 13.43 |

SD*: Strongly Disagree; D*: Disagree; N*: Neutral; A*: Agree; SA*: Strongly Agree

**Table S6:** Agree Likert Scale Numerical Ranges

First, numerical codes are assigned to each Likert option as 1: Strongly Disagree, 2: Disagree, 3: Neutral, 4: Agree, 5: Strongly Agree. Then a factor for increment is calculated as

(“Numerical code for SA” – “Numerical code for SD”) / Total number of options.

This gives an increment factor of (5-1)/5 = 0.8. Using this increment factor, lower and upper ranges for each Likert scale are calculated as below.

Agree Likert Scale Numerical Ranges:

| **Likert Option** | **Lower Range** | **Upper Range** | **Range** |
| --- | --- | --- | --- |
| Strongly Disagree | 1 | (Lower range + increment factor)  =1+0.8 = 1.8 | 1 – 1.8 |
| Disagree | Previous upper range + 0.1  = 1.8 + 0.1 = 1.9 | Previous upper range + 0.8  1.8 + 0.8 = 2.6 | 1.9 – 2.6 |
| Neutral | 2.6 + 0.1 = 2.7 | 2.6 + 0.8 = 3.4 | 2.7 – 3.4 |
| Agree | 3.4 + 0.1 = 3.5 | 3.4 + 0.8 = 4.2 | 3.5 – 4.2 |
| Strongly Agree | 4.2 + 0.1 = 4.3 | 4.2 + 0.8 = 5 | 4.3 - 5 |

**Table S7**: Mean of KAB Scores by Year of Study

|  | **Freshman** | **Sophomore** | **Junior** | **Senior** |
| --- | --- | --- | --- | --- |
| **Knowingness** |  |  |  |  |
| K1 | 3.6 | 3.67 | 3.46 | 3.76 |
| K2 | 3.6 | 3.78 | 3.58 | 3.83 |
| K3 | 3.75 | 3.67 | 3.81 | 4.03 |
| K4 | 3.48 | 3.56 | 3.54 | 3.75 |
| K5 | 3.85 | 3.78 | 3.73 | 3.8 |
| K6 | 3.9 | 4.44 | 3.62 | 4.02 |
| K7 | 3.8 | 3.44 | 3.58 | 3.9 |
| K8 | 3.75 | 3.56 | 3.65 | 3.81 |
| K9 | 3.58 | 3.89 | 3.23 | 3.71 |
| **Attitude** |  |  |  |  |
| A1 | 3.2 | 3.22 | 3.19 | 3.61 |
| A2 | 3.58 | 3.56 | 3.73 | 3.81 |
| A3 | 3.6 | 3.89 | 3.73 | 3.93 |
| A4 | 3.92 | 4.11 | 3.88 | 3.76 |
| A5 | 3.92 | 3.89 | 3.62 | 3.92 |
| A6 | 3.72 | 3.89 | 3.73 | 3.83 |
| A7 | 3.6 | 3.78 | 3.77 | 3.75 |
| A8 | 3.95 | 4 | 3.85 | 3.69 |
| A9 | 3.68 | 3.44 | 3.65 | 3.75 |
| **Behavior** |  |  |  |  |
| B1 | 3.78 | 4.33 | 3.92 | 3.86 |
| B2 | 3.78 | 4.33 | 3.73 | 3.78 |
| B3 | 3.82 | 3.89 | 3.96 | 3.75 |
| B4 | 3.55 | 3.56 | 3.85 | 3.93 |
| B5 | 3.5 | 3.44 | 3.85 | 3.85 |
| B6 | 3.98 | 3.56 | 3.65 | 3.93 |
| B7 | 3.92 | 3.67 | 3.81 | 3.88 |
| B8 | 3.28 | 3.89 | 3.62 | 3.53 |
| B9 | 3.52 | 3.56 | 3.58 | 3.78 |

**Table S8**: Mean of KAB Scores by Place of Living

|  | **City** | **On-Campus** | **Village** |
| --- | --- | --- | --- |
| **Knowingness** |  |  |  |
| K1 | 3.73 | 3.45 | 3.58 |
| K2 | 3.81 | 3.45 | 3.62 |
| K3 | 3.99 | 4.09 | 3.7 |
| K4 | 3.53 | 4.09 | 3.62 |
| K5 | 3.83 | 3.91 | 3.74 |
| K6 | 3.93 | 4.09 | 3.91 |
| K7 | 3.81 | 3.91 | 3.7 |
| K8 | 3.77 | 3.36 | 3.79 |
| K9 | 3.64 | 3.18 | 3.6 |
| **Attitude** |  |  |  |
| A1 | 3.57 | 2.55 | 3.3 |
| A2 | 3.77 | 3.64 | 3.64 |
| A3 | 3.86 | 4.27 | 3.6 |
| A4 | 3.87 | 4.09 | 3.79 |
| A5 | 3.86 | 4.36 | 3.75 |
| A6 | 3.77 | 4.18 | 3.72 |
| A7 | 3.79 | 3.64 | 3.62 |
| A8 | 3.79 | 4.09 | 3.81 |
| A9 | 3.56 | 3.55 | 3.89 |
| **Behavior** |  |  |  |
| B1 | 3.9 | 3.91 | 3.85 |
| B2 | 3.76 | 4.09 | 3.81 |
| B3 | 3.81 | 3.82 | 3.83 |
| B4 | 3.79 | 4.09 | 3.7 |
| B5 | 3.71 | 3.64 | 3.74 |
| B6 | 3.79 | 3.82 | 3.98 |
| B7 | 3.86 | 3.82 | 3.89 |
| B8 | 3.41 | 3.73 | 3.55 |
| B9 | 3.56 | 3.73 | 3.75 |
